# Supplementary material
Source: publisher figshare collection journal article supplement (https://acs.figshare.com/ndownloader/files/3785488)
Supplement: Supplementary file 1 [file 3785488]

 
data_0271b-2 
 
_audit_creation_method            SHELXL-97 
_chemical_name_systematic 
; 
 ? 
; 
_chemical_name_common             ? 
_chemical_melting_point           ? 
_chemical_formula_moiety          'C14 H18 Cl N O' 
_chemical_formula_sum 
 'C14 H18 Cl N O' 
_chemical_formula_weight          251.74 
 
loop_ 
 _atom_type_symbol 
 _atom_type_description 
 _atom_type_scat_dispersion_real 
 _atom_type_scat_dispersion_imag 
 _atom_type_scat_source 
 'C'  'C'   0.0033   0.0016 
 'International Tables Vol C Tables 4.2.6.8 and 6.1.1.4' 
 'H'  'H'   0.0000   0.0000 
 'International Tables Vol C Tables 4.2.6.8 and 6.1.1.4' 
 'N'  'N'   0.0061   0.0033 
 'International Tables Vol C Tables 4.2.6.8 and 6.1.1.4' 
 'O'  'O'   0.0106   0.0060 
 'International Tables Vol C Tables 4.2.6.8 and 6.1.1.4' 
 'Cl'  'Cl'   0.1484   0.1585 
 'International Tables Vol C Tables 4.2.6.8 and 6.1.1.4' 
 
_symmetry_cell_setting            Monoclinic 
_symmetry_space_group_name_H-M    P2(1)/c 
 
loop_ 
 _symmetry_equiv_pos_as_xyz 
 'x, y, z' 
 '-x, y+1/2, -z+1/2' 
 '-x, -y, -z' 
 'x, -y-1/2, z-1/2' 
 
_cell_length_a                    17.401(3) 
_cell_length_b                    8.6470(17) 
_cell_length_c                    9.4509(18) 
_cell_angle_alpha                 90.00 
_cell_angle_beta                  100.955(3) 
_cell_angle_gamma                 90.00 
_cell_volume                      1396.2(5) 
_cell_formula_units_Z             4 
_cell_measurement_temperature     120(2) 
_cell_measurement_reflns_used     21802 
_cell_measurement_theta_min       2.38 
_cell_measurement_theta_max       26.43 
 
_exptl_crystal_description        'platy' 
_exptl_crystal_colour             'white' 
_exptl_crystal_size_max           0.15 
_exptl_crystal_size_mid           0.10 
_exptl_crystal_size_min           0.08 
_exptl_crystal_density_meas       'not measured' 
_exptl_crystal_density_diffrn     1.198 
_exptl_crystal_density_method     'not measured' 
_exptl_crystal_F_000              536 
_exptl_absorpt_coefficient_mu     0.259 
_exptl_absorpt_correction_type    'multi-scan' 
_exptl_absorpt_correction_T_min   0.9623 
_exptl_absorpt_correction_T_max   0.9796 
_exptl_absorpt_process_details    'SADABS' 
 
_exptl_special_details 
; 
 ? 
; 
 
_diffrn_ambient_temperature       120(2) 
_diffrn_radiation_wavelength      0.71073 
_diffrn_radiation_type            MoK\a 
_diffrn_radiation_source          'fine-focus sealed tube' 
_diffrn_radiation_monochromator   graphite 
_diffrn_measurement_device_type   'CCD area detector' 
_diffrn_measurement_method        'phi and omega scans' 
_diffrn_detector_area_resol_mean  ? 
_diffrn_reflns_number             21802 
_diffrn_reflns_av_R_equivalents   0.0538 
_diffrn_reflns_av_sigmaI/netI     0.0333 
_diffrn_reflns_limit_h_min        -21 
_diffrn_reflns_limit_h_max        21 
_diffrn_reflns_limit_k_min        -10 
_diffrn_reflns_limit_k_max        10 
_diffrn_reflns_limit_l_min        -11 
_diffrn_reflns_limit_l_max        11 
_diffrn_reflns_theta_min          2.38 
_diffrn_reflns_theta_max          26.43 
_reflns_number_total              2847 
_reflns_number_gt                 2267 
_reflns_threshold_expression      >2sigma(I) 
 
_computing_data_collection        'Bruker SMART' 
_computing_cell_refinement        'Bruker SMART' 
_computing_data_reduction         'Bruker SAINT' 
_computing_structure_solution     'SHELXS-97 (Sheldrick, 2008)' 
_computing_structure_refinement   'SHELXL-97 (Sheldrick, 2008)' 
_computing_molecular_graphics     'Bruker SHELXTL' 
_computing_publication_material   'Bruker SHELXTL' 
 
_refine_special_details 
; 
 Refinement of F^2^ against ALL reflections.  The weighted R-factor wR and 
 goodness of fit S are based on F^2^, conventional R-factors R are based 
 on F, with F set to zero for negative F^2^. The threshold expression of 
 F^2^ > 2sigma(F^2^) is used only for calculating R-factors(gt) etc. and is 
 not relevant to the choice of reflections for refinement.  R-factors based 
 on F^2^ are statistically about twice as large as those based on F, and R- 
 factors based on ALL data will be even larger. 
; 
 
_refine_ls_structure_factor_coef  Fsqd  
_refine_ls_matrix_type            full 
_refine_ls_weighting_scheme       calc  
_refine_ls_weighting_details 
 'calc w=1/[\s^2^(Fo^2^)+(0.0332P)^2^+0.5613P] where P=(Fo^2^+2Fc^2^)/3' 
_atom_sites_solution_primary      direct 
_atom_sites_solution_secondary    difmap 
_atom_sites_solution_hydrogens    geom 
_refine_ls_hydrogen_treatment     constr
_refine_ls_extinction_method      none 
_refine_ls_extinction_coef        ? 
_refine_ls_number_reflns          2847 
_refine_ls_number_parameters      154 
_refine_ls_number_restraints      0 
_refine_ls_R_factor_all           0.0477 
_refine_ls_R_factor_gt            0.0351 
_refine_ls_wR_factor_ref          0.0891 
_refine_ls_wR_factor_gt           0.0826 
_refine_ls_goodness_of_fit_ref    1.046 
_refine_ls_restrained_S_all       1.046 
_refine_ls_shift/su_max           0.001 
_refine_ls_shift/su_mean          0.000 
 
loop_ 
 _atom_site_label 
 _atom_site_type_symbol 
 _atom_site_fract_x 
 _atom_site_fract_y 
 _atom_site_fract_z 
 _atom_site_U_iso_or_equiv 
 _atom_site_adp_type 
 _atom_site_occupancy 
 _atom_site_symmetry_multiplicity 
 _atom_site_calc_flag 
 _atom_site_refinement_flags 
 _atom_site_disorder_assembly 
 _atom_site_disorder_group 
Cl1 Cl 0.04294(2) 1.33214(5) 0.45746(4) 0.03020(13) Uani 1 1 d . . . 
O1 O 0.32137(8) 0.74080(14) 0.85192(12) 0.0385(3) Uani 1 1 d . . . 
N1 N 0.32936(7) 0.85566(14) 0.63934(13) 0.0216(3) Uani 1 1 d . . . 
H1A H 0.3122 0.8514 0.5456 0.026 Uiso 1 1 calc R . . 
C1 C 0.08268(9) 1.14682(17) 0.48570(17) 0.0232(3) Uani 1 1 d . . . 
C2 C 0.07126(9) 1.04167(18) 0.37361(17) 0.0261(3) Uani 1 1 d . . . 
H2A H 0.0430 1.0700 0.2812 0.031 Uiso 1 1 calc R . . 
C3 C 0.10188(9) 0.89388(19) 0.39852(17) 0.0262(4) Uani 1 1 d . . . 
H3A H 0.0938 0.8206 0.3222 0.031 Uiso 1 1 calc R . . 
C4 C 0.14423(9) 0.85047(18) 0.53283(16) 0.0231(3) Uani 1 1 d . . . 
C5 C 0.15361(9) 0.95913(18) 0.64418(16) 0.0243(3) Uani 1 1 d . . . 
H5A H 0.1811 0.9309 0.7373 0.029 Uiso 1 1 calc R . . 
C6 C 0.12354(9) 1.10722(18) 0.62132(16) 0.0245(3) Uani 1 1 d . . . 
H6A H 0.1308 1.1806 0.6975 0.029 Uiso 1 1 calc R . . 
C7 C 0.17448(9) 0.69072(18) 0.55513(17) 0.0264(4) Uani 1 1 d . . . 
H7A H 0.1425 0.6121 0.5041 0.032 Uiso 1 1 calc R . . 
C8 C 0.24095(9) 0.64336(18) 0.63780(17) 0.0258(4) Uani 1 1 d . . . 
C9 C 0.26124(11) 0.47444(19) 0.6610(2) 0.0380(4) Uani 1 1 d . . . 
H9A H 0.2199 0.4112 0.6040 0.057 Uiso 1 1 calc R . . 
H9B H 0.2660 0.4491 0.7633 0.057 Uiso 1 1 calc R . . 
H9C H 0.3110 0.4533 0.6307 0.057 Uiso 1 1 calc R . . 
C10 C 0.30068(9) 0.75178(17) 0.71953(16) 0.0245(3) Uani 1 1 d . . . 
C11 C 0.38730(9) 0.97748(19) 0.69254(16) 0.0259(4) Uani 1 1 d . . . 
C12 C 0.46557(11) 0.9044(2) 0.7567(2) 0.0498(5) Uani 1 1 d . . . 
H12A H 0.4600 0.8422 0.8409 0.075 Uiso 1 1 calc R . . 
H12B H 0.5045 0.9858 0.7861 0.075 Uiso 1 1 calc R . . 
H12C H 0.4827 0.8380 0.6845 0.075 Uiso 1 1 calc R . . 
C13 C 0.35839(11) 1.0791(2) 0.8035(2) 0.0400(5) Uani 1 1 d . . . 
H13A H 0.3082 1.1259 0.7600 0.060 Uiso 1 1 calc R . . 
H13B H 0.3968 1.1608 0.8356 0.060 Uiso 1 1 calc R . . 
H13C H 0.3516 1.0159 0.8864 0.060 Uiso 1 1 calc R . . 
C14 C 0.39405(13) 1.0749(2) 0.5613(2) 0.0469(5) Uani 1 1 d . . . 
H14A H 0.3431 1.1210 0.5215 0.070 Uiso 1 1 calc R . . 
H14B H 0.4108 1.0093 0.4882 0.070 Uiso 1 1 calc R . . 
H14C H 0.4326 1.1572 0.5897 0.070 Uiso 1 1 calc R . . 
 
loop_ 
 _atom_site_aniso_label 
 _atom_site_aniso_U_11 
 _atom_site_aniso_U_22 
 _atom_site_aniso_U_33 
 _atom_site_aniso_U_23 
 _atom_site_aniso_U_13 
 _atom_site_aniso_U_12 
Cl1 0.0320(2) 0.0215(2) 0.0366(2) 0.00333(17) 0.00529(16) 0.00259(17) 
O1 0.0584(8) 0.0377(7) 0.0196(6) 0.0071(5) 0.0077(5) -0.0013(6) 
N1 0.0271(7) 0.0212(7) 0.0160(6) -0.0002(5) 0.0031(5) -0.0013(5) 
C1 0.0215(8) 0.0195(8) 0.0297(8) 0.0034(6) 0.0075(6) -0.0012(6) 
C2 0.0269(8) 0.0268(9) 0.0239(8) 0.0023(7) 0.0033(6) -0.0038(7) 
C3 0.0290(8) 0.0249(8) 0.0253(8) -0.0045(7) 0.0065(6) -0.0056(7) 
C4 0.0216(8) 0.0213(8) 0.0277(8) 0.0004(6) 0.0083(6) -0.0033(6) 
C5 0.0242(8) 0.0256(8) 0.0238(8) 0.0024(7) 0.0063(6) 0.0008(7) 
C6 0.0251(8) 0.0240(8) 0.0254(8) -0.0033(6) 0.0074(6) -0.0013(6) 
C7 0.0308(9) 0.0194(8) 0.0312(8) -0.0016(7) 0.0116(7) -0.0049(7) 
C8 0.0319(9) 0.0199(8) 0.0283(8) 0.0036(6) 0.0126(7) -0.0001(7) 
C9 0.0436(11) 0.0211(9) 0.0500(11) 0.0032(8) 0.0107(9) 0.0014(8) 
C10 0.0312(8) 0.0210(8) 0.0230(8) 0.0030(6) 0.0095(6) 0.0066(7) 
C11 0.0264(8) 0.0246(9) 0.0252(8) -0.0029(7) 0.0009(6) -0.0030(7) 
C12 0.0288(10) 0.0478(12) 0.0678(14) -0.0058(11) -0.0038(9) 0.0030(9) 
C13 0.0462(11) 0.0323(10) 0.0418(10) -0.0150(8) 0.0086(9) -0.0042(9) 
C14 0.0610(13) 0.0406(11) 0.0374(10) 0.0006(9) 0.0052(9) -0.0270(10) 
 
_geom_special_details 
; 
 All esds (except the esd in the dihedral angle between two l.s. planes) 
 are estimated using the full covariance matrix.  The cell esds are taken 
 into account individually in the estimation of esds in distances, angles 
 and torsion angles; correlations between esds in cell parameters are only 
 used when they are defined by crystal symmetry.  An approximate (isotropic) 
 treatment of cell esds is used for estimating esds involving l.s. planes. 
; 
 
loop_ 
 _geom_bond_atom_site_label_1 
 _geom_bond_atom_site_label_2 
 _geom_bond_distance 
 _geom_bond_site_symmetry_2 
 _geom_bond_publ_flag 
Cl1 C1 1.7456(16) . ? 
O1 C10 1.2381(19) . ? 
N1 C10 1.3318(19) . ? 
N1 C11 1.479(2) . ? 
C1 C2 1.381(2) . ? 
C1 C6 1.385(2) . ? 
C2 C3 1.387(2) . ? 
C3 C4 1.393(2) . ? 
C4 C5 1.397(2) . ? 
C4 C7 1.479(2) . ? 
C5 C6 1.385(2) . ? 
C7 C8 1.331(2) . ? 
C8 C10 1.500(2) . ? 
C8 C9 1.509(2) . ? 
C11 C12 1.519(2) . ? 
C11 C14 1.523(2) . ? 
C11 C13 1.525(2) . ? 
 
loop_ 
 _geom_angle_atom_site_label_1 
 _geom_angle_atom_site_label_2 
 _geom_angle_atom_site_label_3 
 _geom_angle 
 _geom_angle_site_symmetry_1 
 _geom_angle_site_symmetry_3 
 _geom_angle_publ_flag 
C10 N1 C11 126.30(13) . . ? 
C2 C1 C6 121.37(14) . . ? 
C2 C1 Cl1 119.47(12) . . ? 
C6 C1 Cl1 119.15(12) . . ? 
C1 C2 C3 118.79(15) . . ? 
C2 C3 C4 121.51(15) . . ? 
C3 C4 C5 118.11(14) . . ? 
C3 C4 C7 119.60(14) . . ? 
C5 C4 C7 122.23(14) . . ? 
C6 C5 C4 121.19(15) . . ? 
C5 C6 C1 119.03(14) . . ? 
C8 C7 C4 128.09(15) . . ? 
C7 C8 C10 123.34(14) . . ? 
C7 C8 C9 122.42(15) . . ? 
C10 C8 C9 114.21(14) . . ? 
O1 C10 N1 123.94(15) . . ? 
O1 C10 C8 120.82(14) . . ? 
N1 C10 C8 115.24(13) . . ? 
N1 C11 C12 109.94(14) . . ? 
N1 C11 C14 105.68(12) . . ? 
C12 C11 C14 110.69(16) . . ? 
N1 C11 C13 110.58(13) . . ? 
C12 C11 C13 110.67(15) . . ? 
C14 C11 C13 109.17(15) . . ? 
 
loop_ 
 _geom_torsion_atom_site_label_1 
 _geom_torsion_atom_site_label_2 
 _geom_torsion_atom_site_label_3 
 _geom_torsion_atom_site_label_4 
 _geom_torsion 
 _geom_torsion_site_symmetry_1 
 _geom_torsion_site_symmetry_2 
 _geom_torsion_site_symmetry_3 
 _geom_torsion_site_symmetry_4 
 _geom_torsion_publ_flag 
C6 C1 C2 C3 -0.2(2) . . . . ? 
Cl1 C1 C2 C3 -178.73(11) . . . . ? 
C1 C2 C3 C4 -0.7(2) . . . . ? 
C2 C3 C4 C5 1.6(2) . . . . ? 
C2 C3 C4 C7 178.85(14) . . . . ? 
C3 C4 C5 C6 -1.6(2) . . . . ? 
C7 C4 C5 C6 -178.82(14) . . . . ? 
C4 C5 C6 C1 0.8(2) . . . . ? 
C2 C1 C6 C5 0.2(2) . . . . ? 
Cl1 C1 C6 C5 178.68(11) . . . . ? 
C3 C4 C7 C8 145.40(17) . . . . ? 
C5 C4 C7 C8 -37.5(2) . . . . ? 
C4 C7 C8 C10 -3.5(3) . . . . ? 
C4 C7 C8 C9 174.38(15) . . . . ? 
C11 N1 C10 O1 -2.4(2) . . . . ? 
C11 N1 C10 C8 178.59(13) . . . . ? 
C7 C8 C10 O1 122.78(18) . . . . ? 
C9 C8 C10 O1 -55.3(2) . . . . ? 
C7 C8 C10 N1 -58.2(2) . . . . ? 
C9 C8 C10 N1 123.72(15) . . . . ? 
C10 N1 C11 C12 66.2(2) . . . . ? 
C10 N1 C11 C14 -174.26(15) . . . . ? 
C10 N1 C11 C13 -56.2(2) . . . . ? 
 
_diffrn_measured_fraction_theta_max    0.995 
_diffrn_reflns_theta_full              26.43 
_diffrn_measured_fraction_theta_full   0.995 
_refine_diff_density_max    0.232 
_refine_diff_density_min   -0.203 
_refine_diff_density_rms    0.044 
